# Supplementary material for: Adipokines and Inflammatory Markers in Acute Myocardial Infarction Patients with and without Obstructive Sleep Apnea: A Comparative Analysis
Source: MDPI journal article supplement (doi:10.3390/ijms241914674), 2023-09-28
Supplement: s1 [file s1]

**Supplementary Materials Table S1.** Value of each variable in figures for future meta-analysis.

| <b>Inflammatory marker</b> | <b>Control OSA</b> | <b>w/o</b> | <b>AMI w/o OSA</b> | <b>Control OSA</b> | <b>w</b> | <b>AMI w OSA</b> | <b>p-Value</b> |
|----------------------------|--------------------|------------|--------------------|--------------------|----------|------------------|----------------|
| Adiponectin                | 10.94±2.97         |            | 9.14±5.21          | 8.86±3.06          |          | 11.71±7.13       | 0.391          |
| Leptin                     | 9.46±9.98          |            | 9.20±10.5          | 21.00±16.18        |          | 24.13±34.11      | 0.046          |
| Resistin                   | 3.69±1.27          |            | 7.40±3.43          | 4.25±1.73          |          | 7.15±4.20        | 0.003          |
| IL-6                       | 1.35±1.17          |            | 8.80±11.16         | 2.48±1.40          |          | 8.94±9.16        | 0.001          |
| TNF-α                      | 10.30±4.25         |            | 11.35±3.12         | 11.06±2.29         |          | 12.13±4.85       | 0.410          |
| PAI-1                      | 3.52±1.51          |            | 2.37±0.96          | 3.85±1.35          |          | 3.91±1.94        | 0.024          |
| ET-1                       | 1.83±0.35          |            | 3.31±1.42          | 2.15±0.45          |          | 3.22±2.10        | <0.001         |
| SAA                        | 50.64±39.85        |            | 339±335.4          | 40.56±37.47        |          | 181.3±227.9      | 0.011          |
| CRP                        | 23.42±3.79         |            | 30.0±3.41          | 26.68±1.54         |          | 26.5±2.69        | <0.001         |
